# Supplementary material for: A full-spectrum responsive B-TiO2@SiO2–HA nanotheranostic system for NIR-II photoacoustic imaging-guided cancer phototherapy
Source: Royal Society of Chemistry journal article supplement (doi:10.1039/d0tb02952a), 2021-01-01
Supplement: d0tb02952a1.pdf [file d0tb02952a1.pdf]

### Supporting Information

#### **Full-spectrum responsive B-TiO<sub>2</sub>@SiO<sub>2</sub>-HA nanotheranostics for NIR-II photoacoustic imaging-guided cancer phototherapy**

Xiaolu Guo,<sup>‡</sup> Changchun Wen,<sup>‡</sup> Qianxin Xu, Changping Ruan, Xing-Can Shen\* and Hong Liang\*

State Key Laboratory for the Chemistry and Molecular Engineering of Medicinal Resources, College of Chemistry and Pharmacy Sciences, Guangxi Normal University, Guilin, 541004, P. R. China

E-mail: xcshen@mailbox.gxnu.edu.cn;

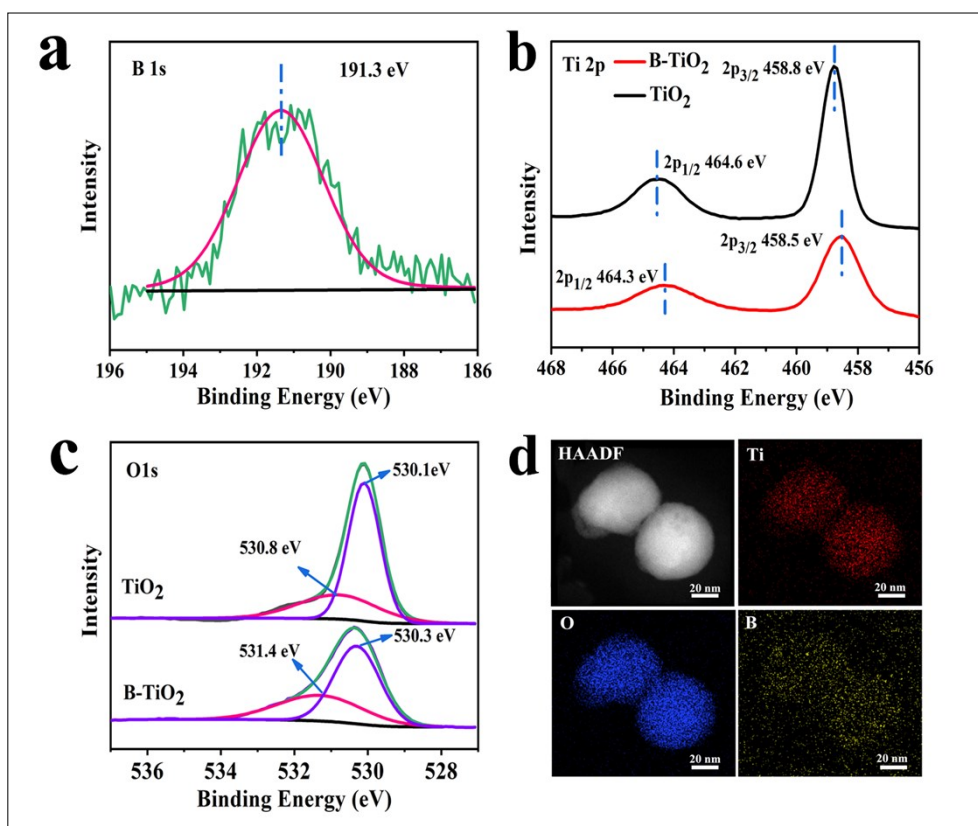

Fig. S1 (a) High-resolution B 1s spectra of B-TiO<sub>2</sub>; High-resolution (b) Ti 2p and (c) O 1s spectra of TiO<sub>2</sub> and B-TiO<sub>2</sub>; (d) HAADF-STEM image of B-TiO<sub>2</sub> and corresponding element mapping images of Ti, O, and B elements.

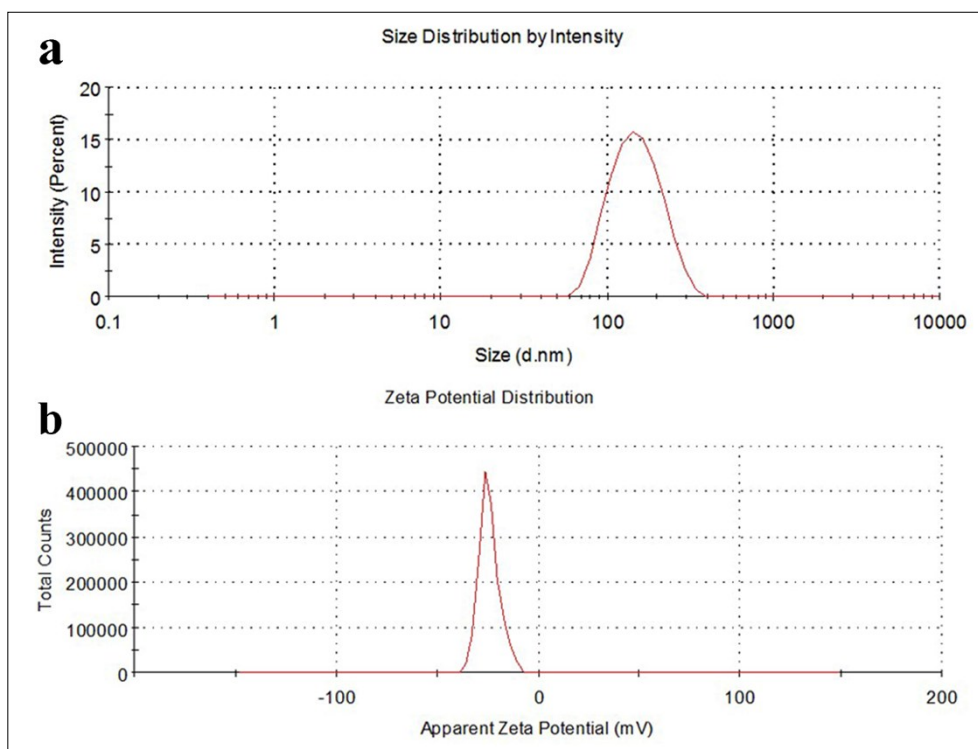

Fig. S2 (a) Hydrodynamic diameter distribution and (b) Zeta potential of B-TiO<sub>2</sub>@SiO<sub>2</sub>-HA nanocomposites.

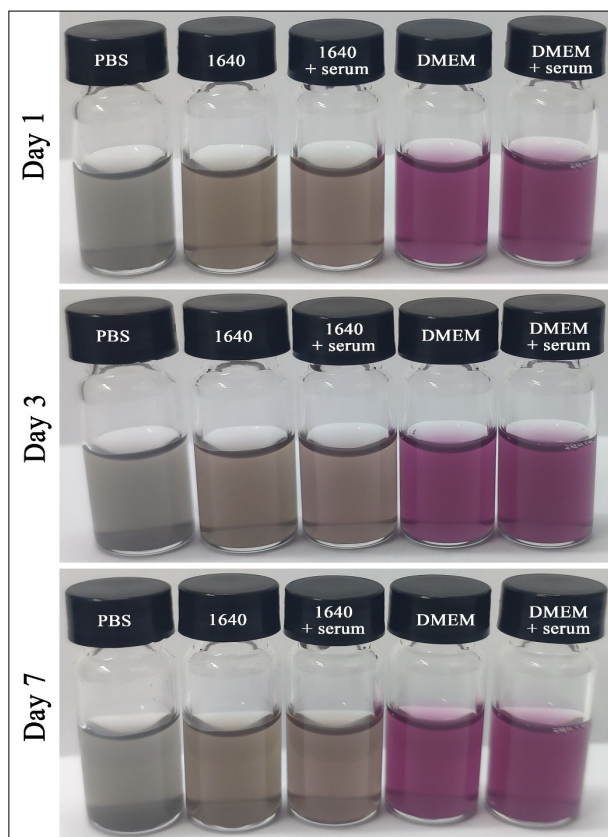

Fig. S3 Time-dependent photographs of B-TiO<sub>2</sub>@SiO<sub>2</sub>-HA in PBS, 1640, 1640 + serum, DMEM, DMEM + serum on the 0, 3, and 7 days respectively.

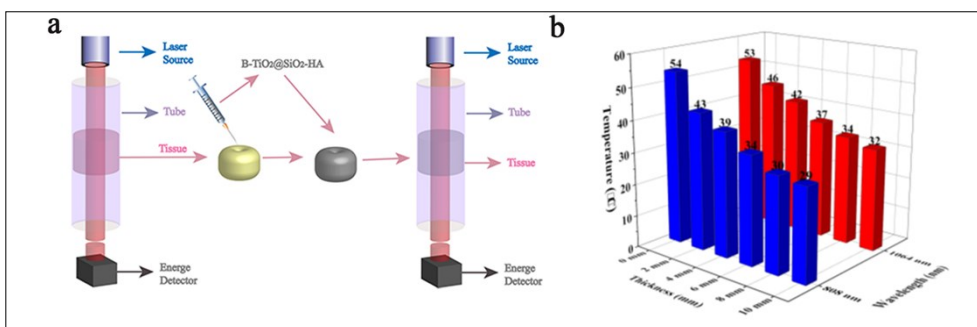

Fig. S4 (a) Schematic diagram of irradiation of chicken breast tissue of different thicknesses (0, 2, 4, 6, 8, 10 mm) by laser at 808 and 1064 nm. (b) Temperature elevations of aqueous suspensions of B-TiO<sub>2</sub>@SiO<sub>2</sub>-HA upon exposures to tissue-penetrating NIR-I and NIR-II laser via photothermal conversion.

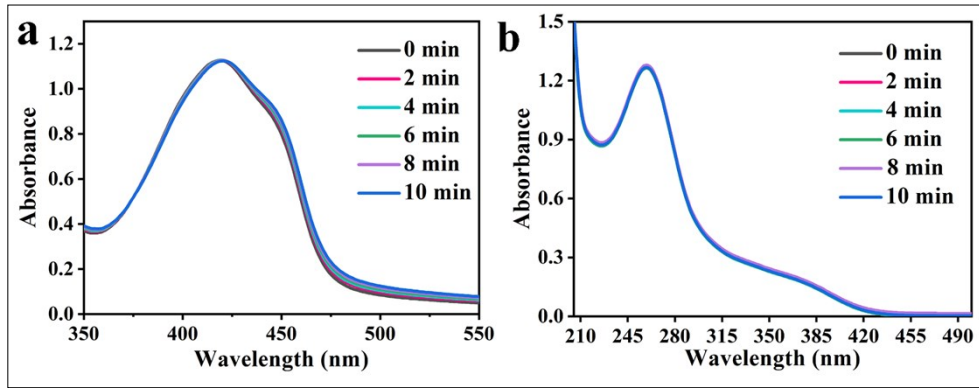

Fig. S5 UV-vis absorption spectra of DPBF solution (a) and NBT solution (b) after exposure to 1064 nm laser for different time durations.

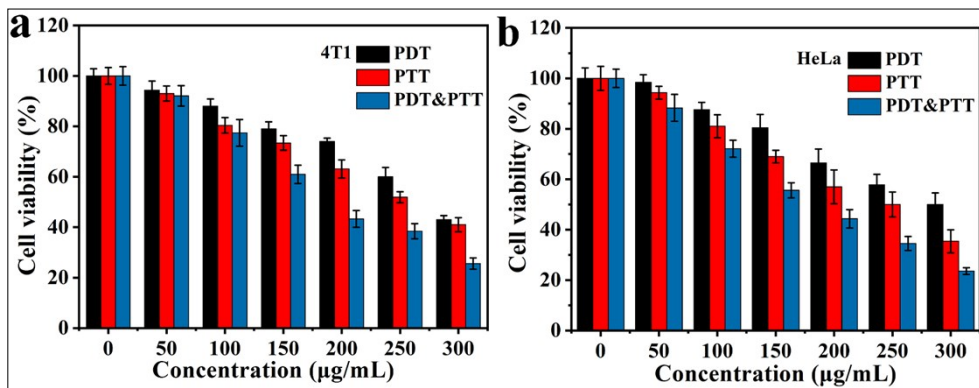

Fig. S6 *In vitro* photodynamic and photothermal cell-killing effect, the comparisons of the therapeutic effect of PTT, PDT, and the combined PTT/PDT towards 4T1 (a) and HeLa (b) cells after the exposure to 1064 nm laser irradiations.

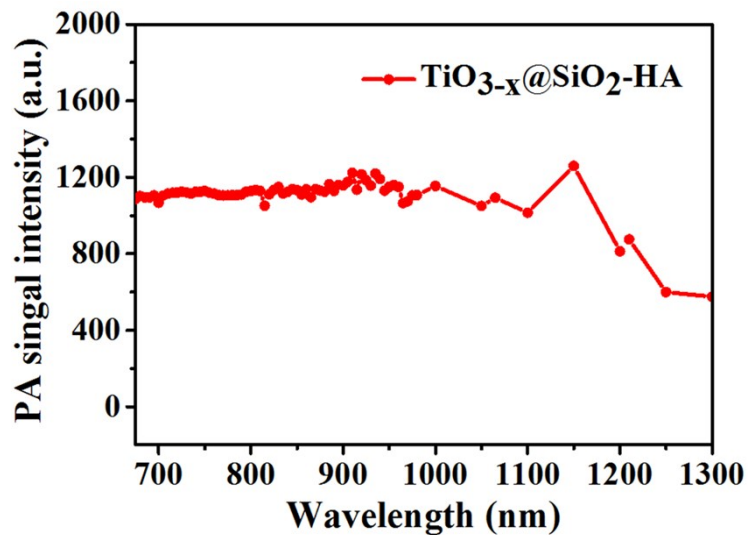

Fig. S7 Photoacoustic spectrum data of B-TiO<sub>2</sub>@SiO<sub>2</sub>-HA.

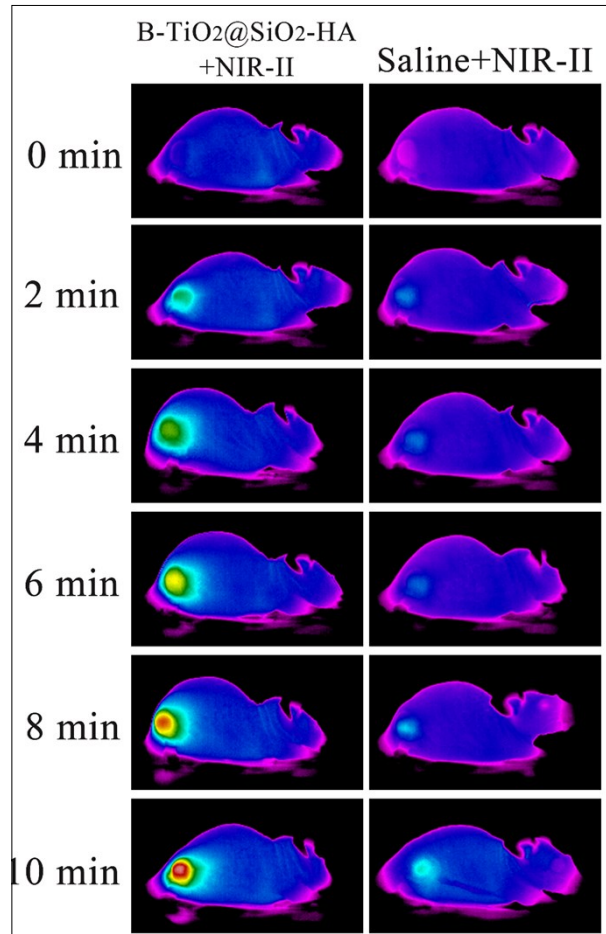

Fig. S8 Infrared thermal images of the mice after intravenous injection of the B-TiO<sub>2</sub>@SiO<sub>2</sub>-HA solution (100 μL, 1000 μg mL<sup>-1</sup>) or saline, followed by exposure to 1064 nm laser (laser power: 1.0 W cm<sup>-2</sup>; irradiation time: 10 minutes).

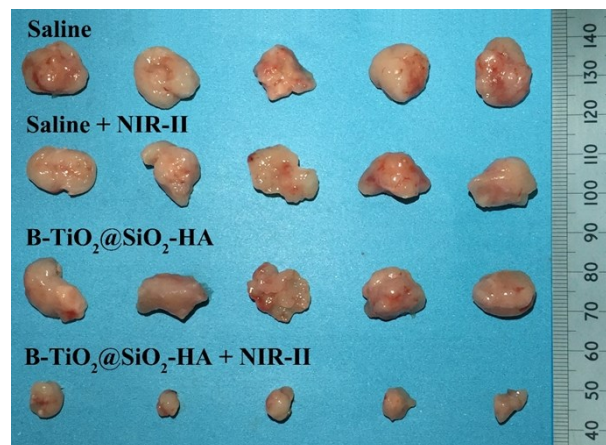

Fig. S9 Digital photos of extracted tumors.

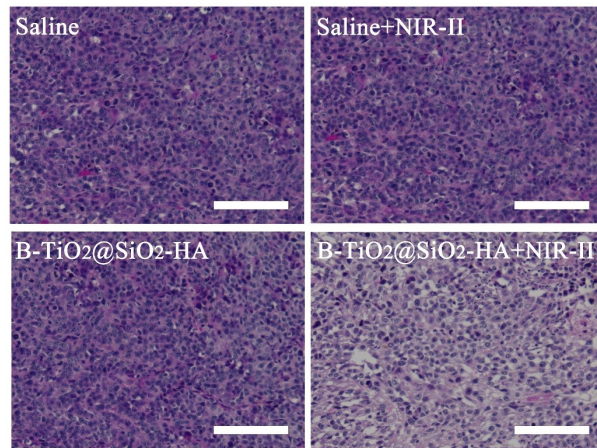

Fig. S10 H&E staining of the tumor tissues.
